# Supplementary material for: Phagosomal Acidification Is Required to Kill Streptococcus pneumoniae in a Zebrafish Model
Source: Hindawi journal article supplement (doi:10.1155/2022/9429516), 2022-06-09

WT 1 hpi - GFP

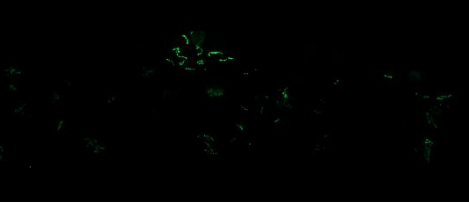

WT 1 hpi - mCherry

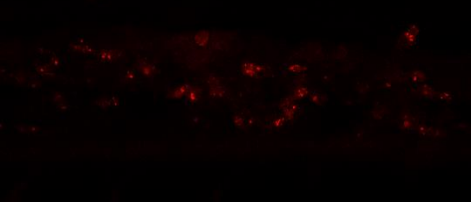

WT 1 hpi - Cy5

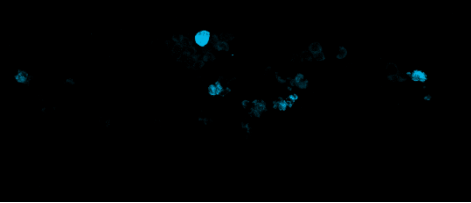

WT 1 hpi - Merge

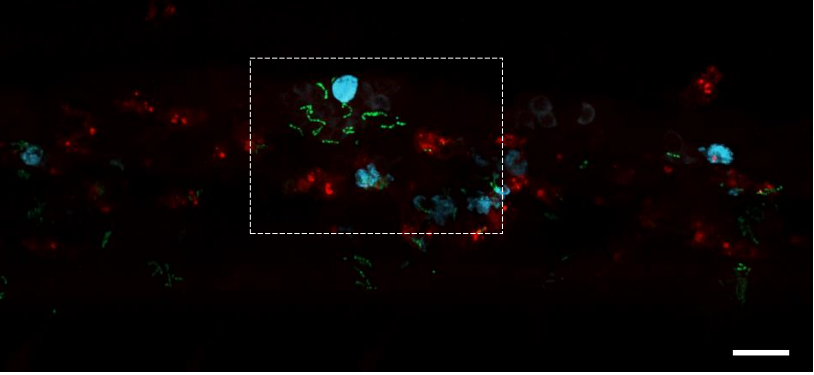

WT 1 hpi - Merge - Zoom

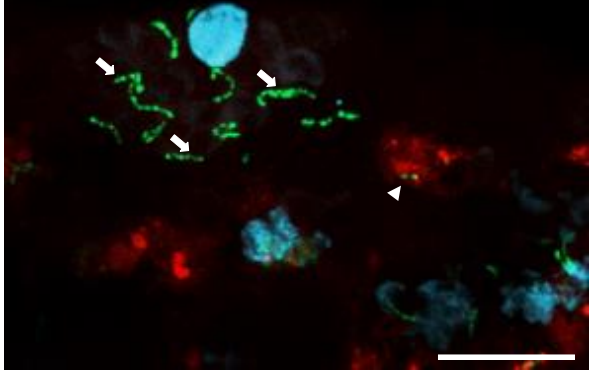

WT 2 hpi - GFP

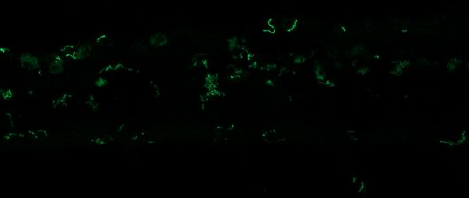

WT 2 hpi - mCherry

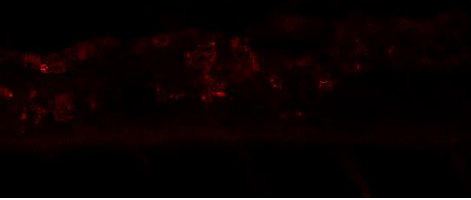

WT 2 hpi - Cy5

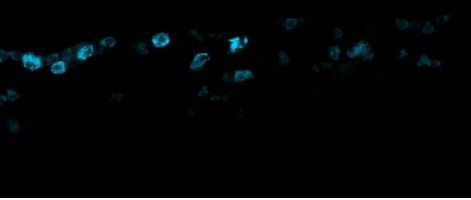

WT 2 hpi - Merge

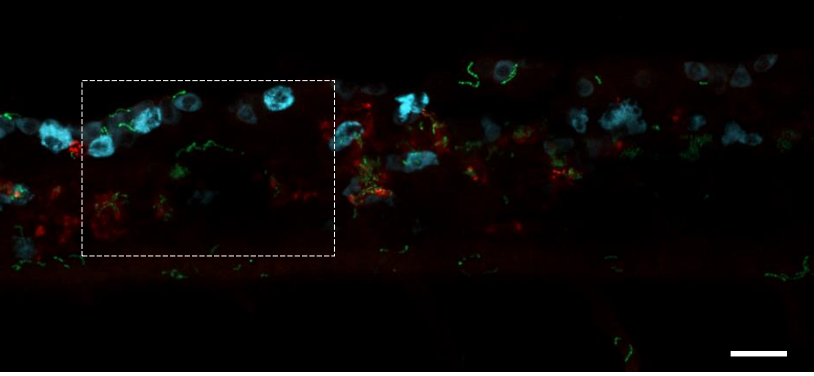

WT 2 hpi - Merge - Zoom

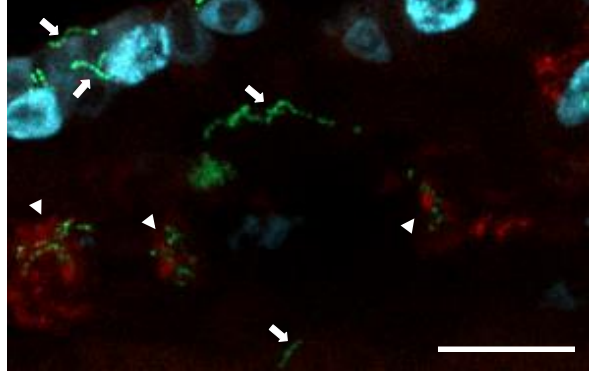

WT 4 hpi - GFP

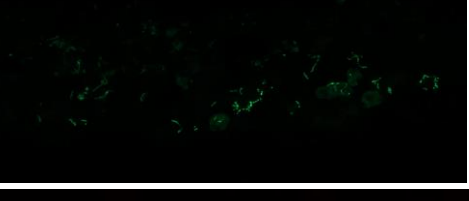

WT 4 hpi - mCherry

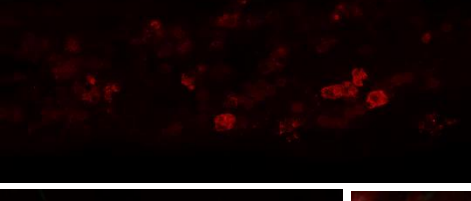

WT 4 hpi - Cy5

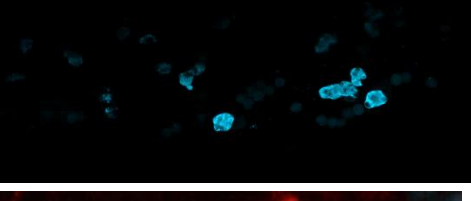

WT 4 hpi - Merge

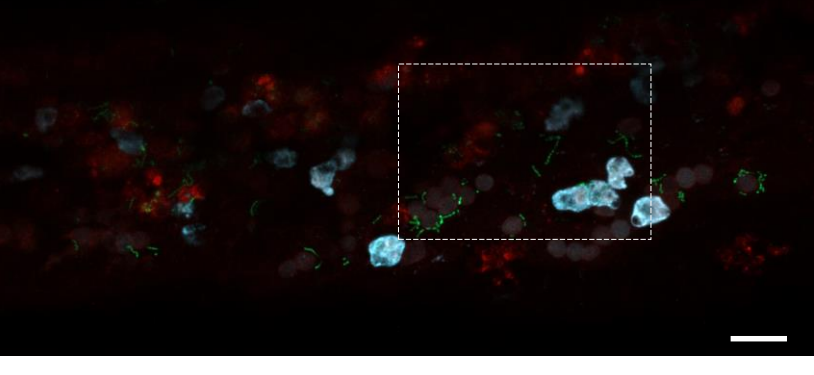

WT 4 hpi - Merge - Zoom

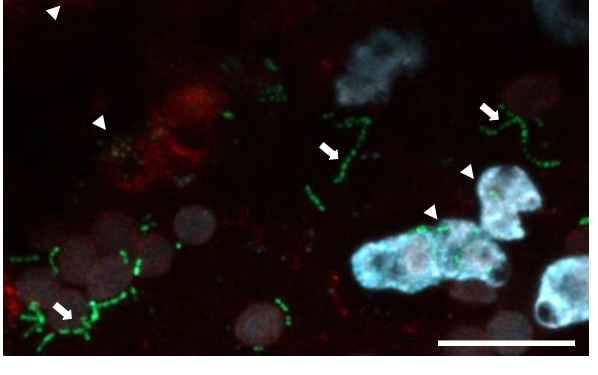

Supplement: f1 [file 9429516.f1.zip › 9429516.f1/Figure S2.pdf]
