# Supplementary material for: Phagosomal Acidification Is Required to Kill Streptococcus pneumoniae in a Zebrafish Model
Source: Hindawi journal article supplement (doi:10.1155/2022/9429516), 2022-06-09

*Δcps* 1 hpi - GFP

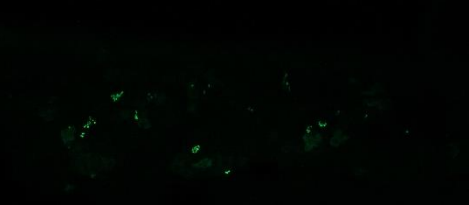

*Δcps* 1 hpi - mCherry

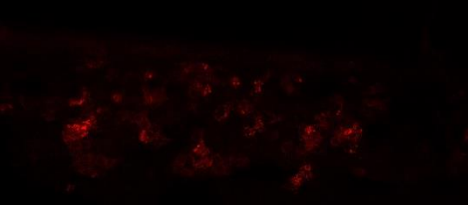

*Δcps* 1 hpi - Cy5

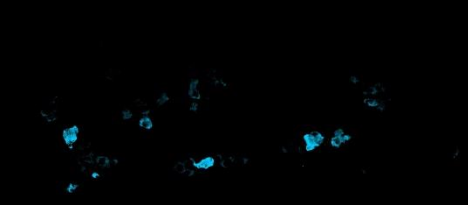

*Δcps* 1 hpi - Merge

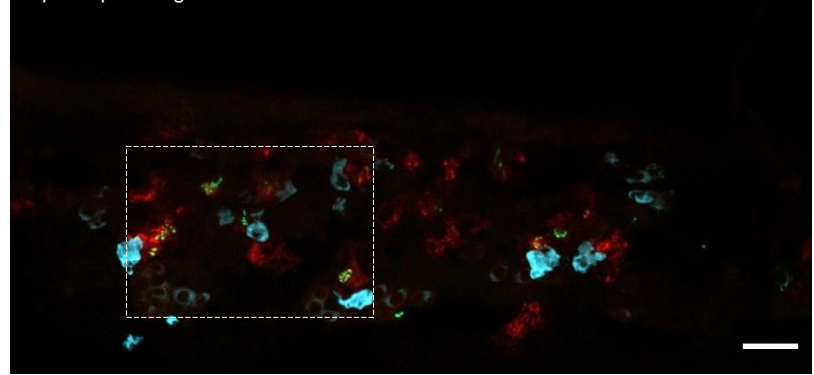

*Δcps* 1 hpi - Merge - Zoom

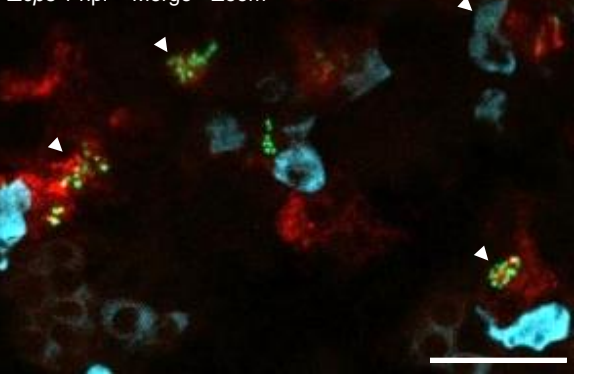

*Δcps* 2 hpi - GFP

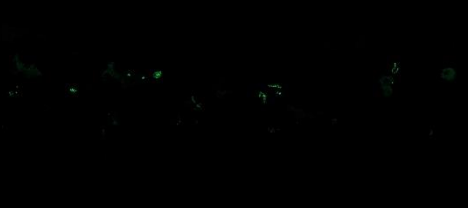

*Δcps* 2 hpi - mCherry

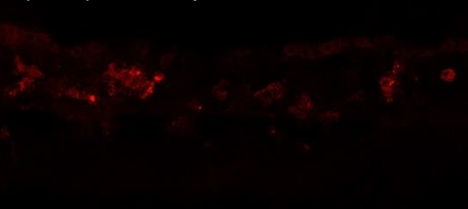

*Δcps* 2 hpi - Cy5

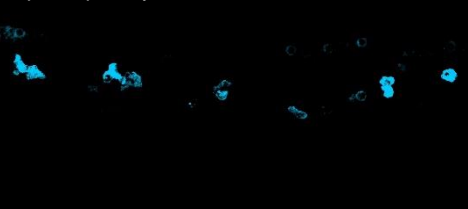

*Δcps* 2 hpi - Merge

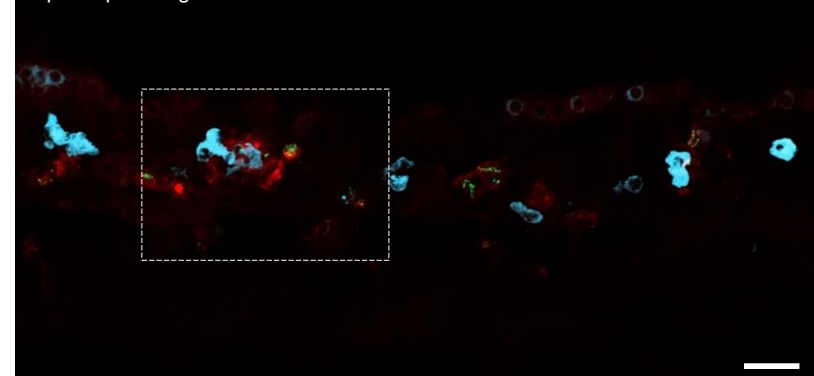

*Δcps* 2 hpi - Merge - Zoom

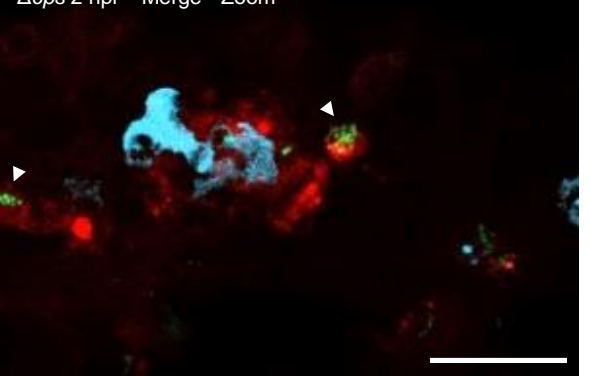

*Δcps* 4 hpi - GFP

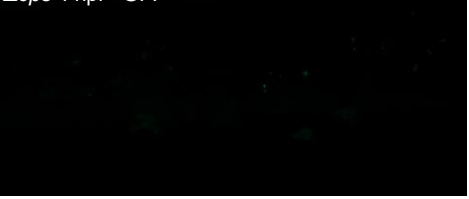

*Δcps* 4 hpi - mCherry

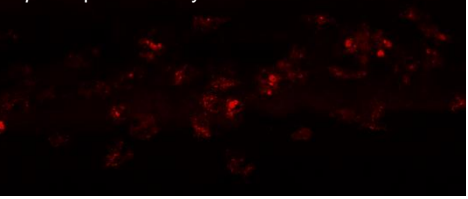

*Δcps* 4 hpi - Cy5

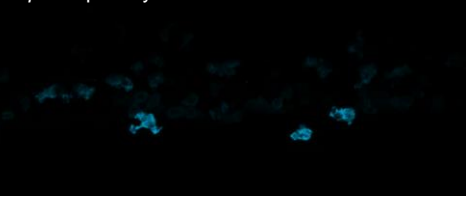

*Δcps* 4 hpi - Merge

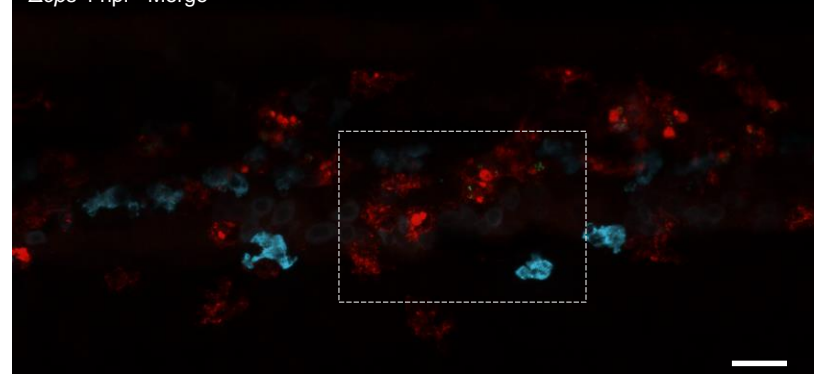

*Δcps* 4 hpi - Merge - Zoom

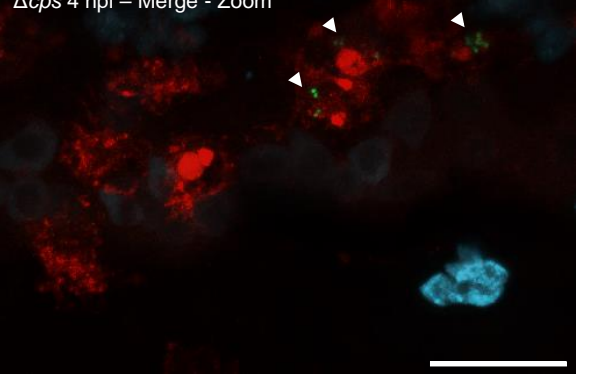

Supplement: f1 [file 9429516.f1.zip › 9429516.f1/Figure S3.pdf]
