# Supplementary material for: Phagosomal Acidification Is Required to Kill Streptococcus pneumoniae in a Zebrafish Model
Source: Hindawi journal article supplement (doi:10.1155/2022/9429516), 2022-06-09
Supplement: f1 [file 9429516.f1.zip]

Archive with 7 entries (7 files):
- 9429516.f1/Supplementary Figure Legends.docx
- 9429516.f1/Figure S6.pdf
- 9429516.f1/Figure S5.pdf
- 9429516.f1/Figure S4.pdf
- 9429516.f1/Figure S3.pdf
- 9429516.f1/Figure S2.pdf
- 9429516.f1/Figure S1.pdf
