# Supplementary material for: Phagosomal Acidification Is Required to Kill Streptococcus pneumoniae in a Zebrafish Model
Source: Hindawi journal article supplement (doi:10.1155/2022/9429516), 2022-06-09
Supplement: f1 [file 9429516.f1.zip › 9429516.f1/Supplementary Figure Legends.docx]

**Supplementary Figure Legends**

**Figure S1.*S. pneumoniae*-infected zebrafish larvae can be cured by antibiotic treatment** (**A**) Survival of zebrafish larvae following infection at 54 hpf with 100 CFU of encapsulated *S. pneumoniae* D39 WT treated at 1 hpi with various concentrations of penicillin G (n≥34 individual animals over two independent experiments). **** - p<0.0001. (**B-C**) Representative *in vivo* images (n=6) at 24 hpi of control (non-treated) zebrafish larvae (**B**) or larvae treated with 1.25 µg/ml penicillin G (**C**) upon infection with 100 CFU of D39 labelled with GFP. Dashed rectangles represent zoomed panels in B’ and C’. Scale bars represent 500 µm. **(D-E)** Survival of zebrafish larvae (n≥19) following infection at 54 hpf with 100 CFU of encapsulated *S. pneumoniae* D39 sensitive (**D**) or resistant to chloramphenicol (**E**) treated at 1 hpi with 80 µg/ml of chloramphenicol. **** - p<0.0001, ns – not significant.

**Figure S2.Separate fluorescence channels from Figure 2B - encapsulated pneumococci** Individual fluorescence channels: GFP – D39 WT bacteria, mCherry – macrophages and Cy5 – neutrophils. Maximum projection images taken at 1, 2 and 4 hpi. Dashed rectangles represent zoomed-in areas.White arrowheads indicate examples of internalised pneumococci whereas white arrows point at extracellular bacteria. Scale bars represent 20 µm.

**Figure S3.Separate fluorescence channels from Figure 2B - unencapsulated pneumococci**
Individual fluorescence channels: GFP – D39 ∆*cps* bacteria, mCherry – macrophages and Cy5 – neutrophils. Maximum projection images taken at 1, 2 and 4 hpi. Dashed rectangles represent zoomed-in areas. White arrowheads indicate examples of internalised pneumococci. Scale bars represent 20 µm.

**Figure S4. Functional verification of *irf8* knockdown efficiency**(**A-B**) Representative images (n=12-14) of control (**A**) and *irf8* knockdown (**B**) *Tg(mpx:GFP)* x *Tg(mpeg:mCherry-F)* dual transgenic zebrafishlarvae at 48 hpf. Asterisks indicate pigment cells (iridophores) exhibiting red autofluorescence which are not macrophages. Panels **A**’ and **B**’ show areas of the tail region including the caudal hematopoietic tissue (CHT) with red-labelled macrophages and green-labelled neutrophils. Scale bars represent 250 µm (for **A** and **B**) or 100 µm (for **A**’ and **B**’). (**C**) Quantification of the number of macrophages and neutrophils per field in the tail region (dashed boxes in panels **A** and **B**). n=12-14 zebrafish larvae quantified in each group in two independent experiments. **** - p<0.0001.

**Figure S5. Genetic and functional verification of *atp6v0ca* knockdown efficiency**(**A**) Electrophoresis gel scan of polymerase chain reaction (PCR) productsof control and *atp6v0ca* CRISPant zebrafish at 48 hpf used to determine the efficacy of *atp6v0ca*mutagenesis efficacy. The primers used were flanking the *atp6v0ca* CRISPR target site and the expected PCR product size in unaffected larvae is 223 bp. All tested *atp6v0ca*CRISPant larvae showed mutagenesis as depicted by a smeared PCR product. (**B-C**) Stereomicroscopic brightfield images of control siblings (**B**) and *atp6v0ca* CRISPant (**C**) zebrafish larvae at 48 hpi. CRISPR-injected embryos demonstrateda pigment dilution phenotype. Scale bars represent 500 µm.

**Figure S6.Knockdown of *atp6v0ca* leads to impaired acidification of internalised pneumococci**(**A-B**) Representative *in vivo* images (n=10) of circulation valley of control (**A**) and *atp6v0ca* CRISPant (**B**) larvae at 1 hpi injected with *S. pneumoniae* D39 ∆*cps* GFP prestained with pHrodo. Panels **A**’ and **B**’ represent zoomed-in areas (dashed squares) from **A** and **B** respectively. Scale bars represent 50 µm (for **A** and **B**) or 10 µm (for **A**’ and **B**’).(**C-D**) Quantification of pHrodo Red (**C**) and GFP (**D**) fluorescence intensity within phagocytes containing pneumococci. (For both **C** and **D** n=160-163 phagocytes quantified over 10 zebrafish larvae analysed in each group in two independent experiments). **** - *p*<0.0001.
