# Supplementary figures and images for: Phagosomal Acidification Is Required to Kill Streptococcus pneumoniae in a Zebrafish Model
Source: Hindawi journal article supplement (doi:10.1155/2022/9429516), 2022-06-09

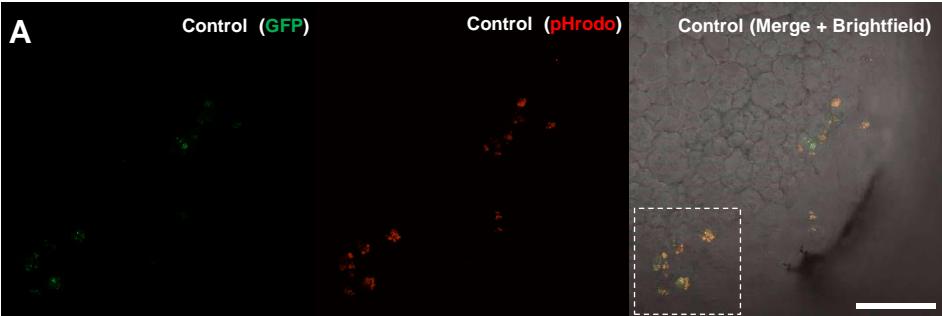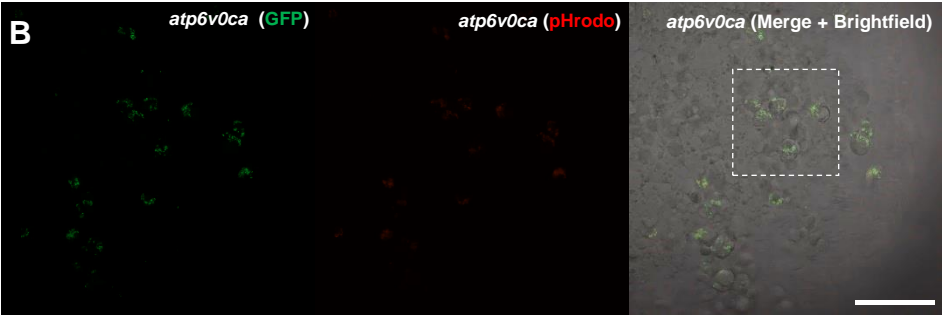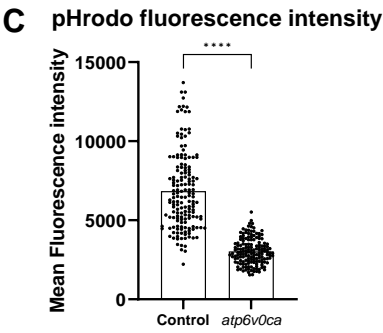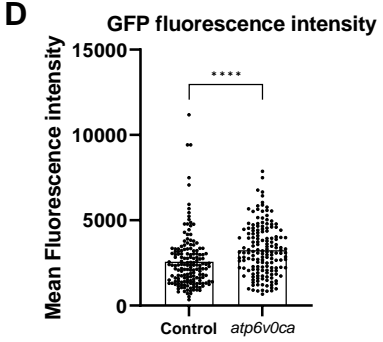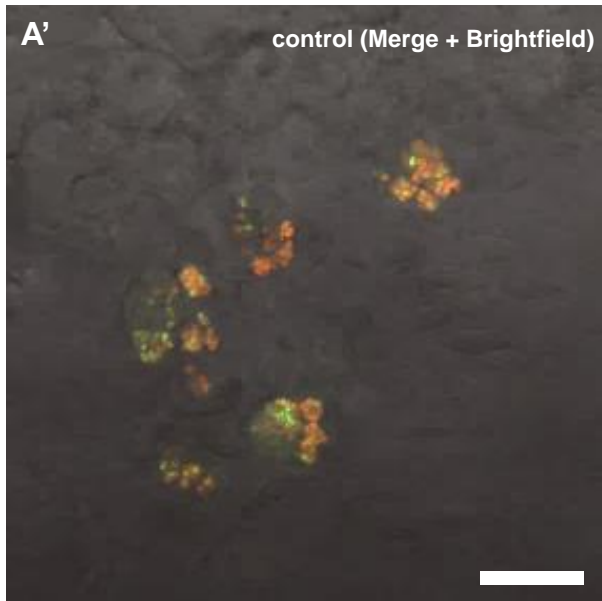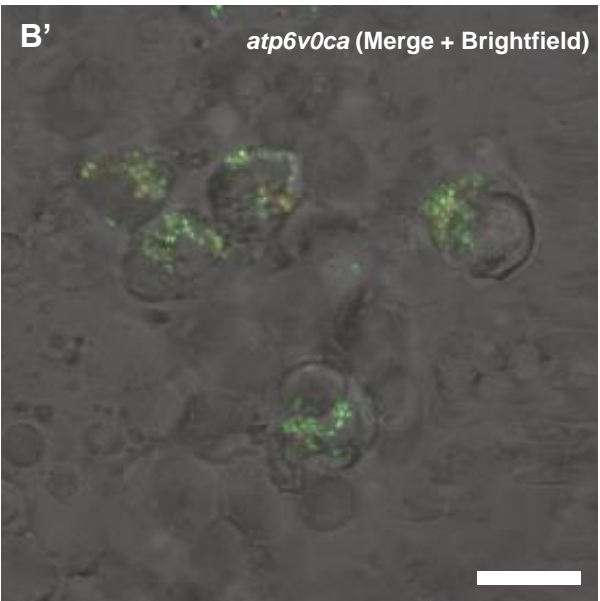

Supplement: f1 [file 9429516.f1.zip › 9429516.f1/Figure S6.pdf]

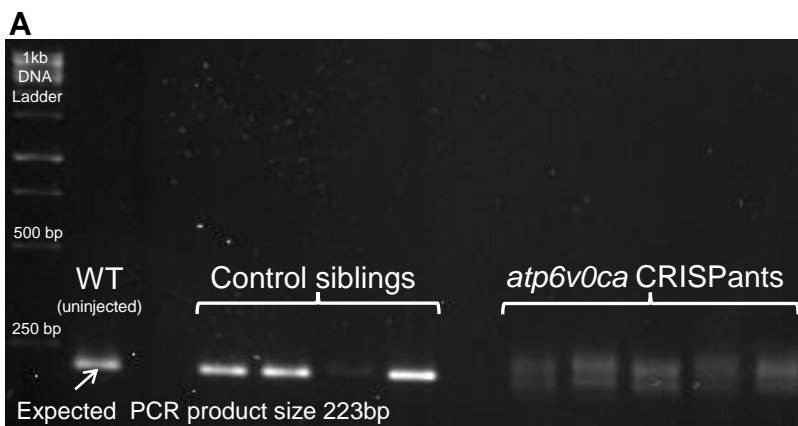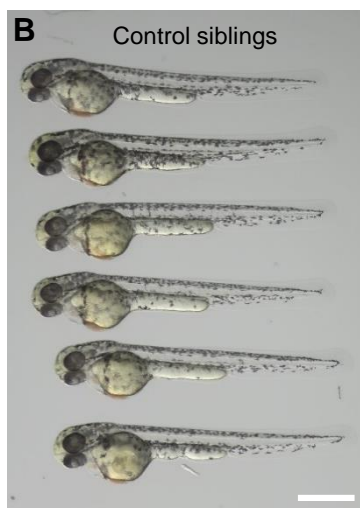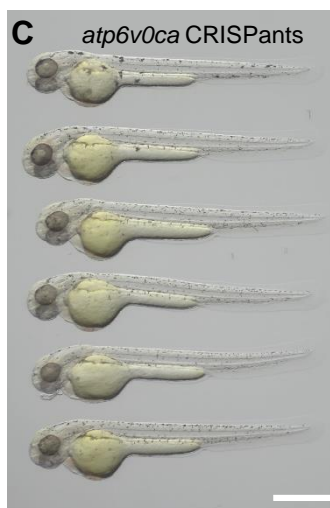

Supplement: f1 [file 9429516.f1.zip › 9429516.f1/Figure S5.pdf]

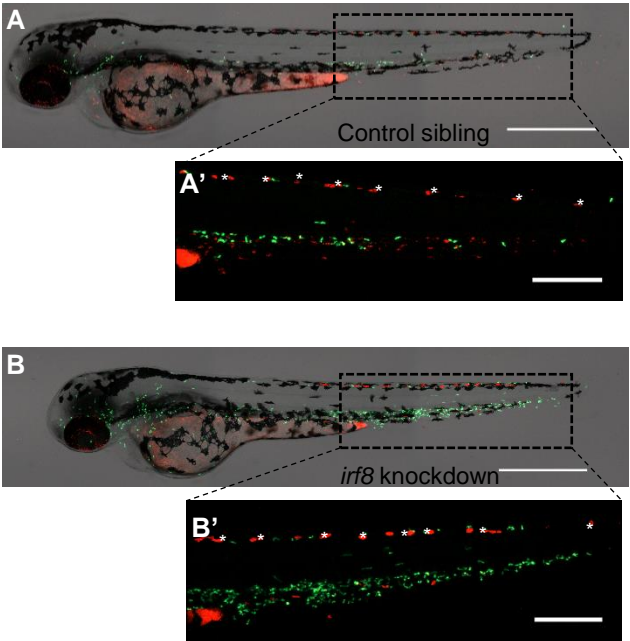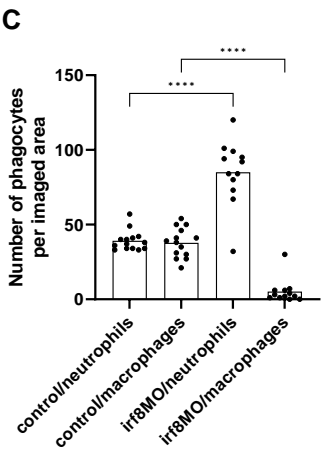

Supplement: f1 [file 9429516.f1.zip › 9429516.f1/Figure S4.pdf]

A

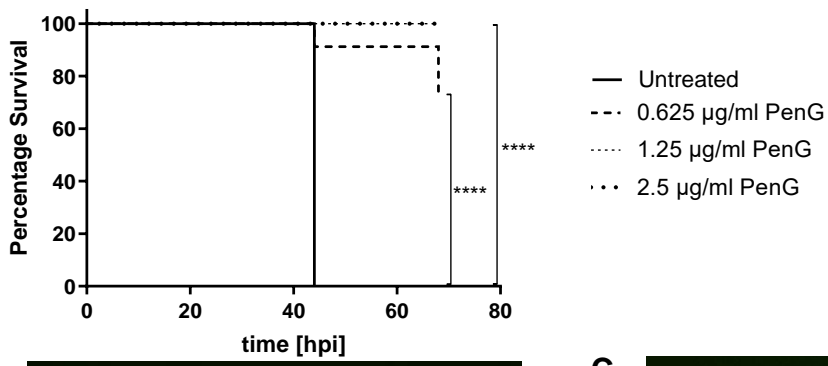

B

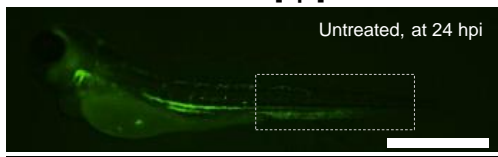

B'

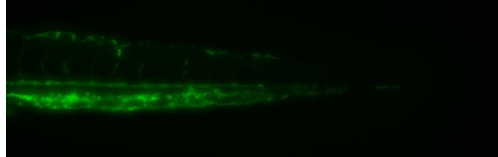

C

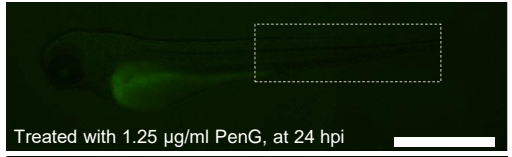

C'

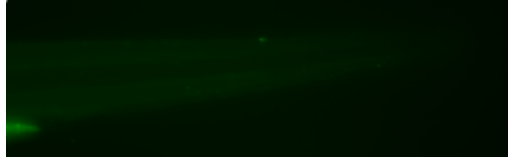

D

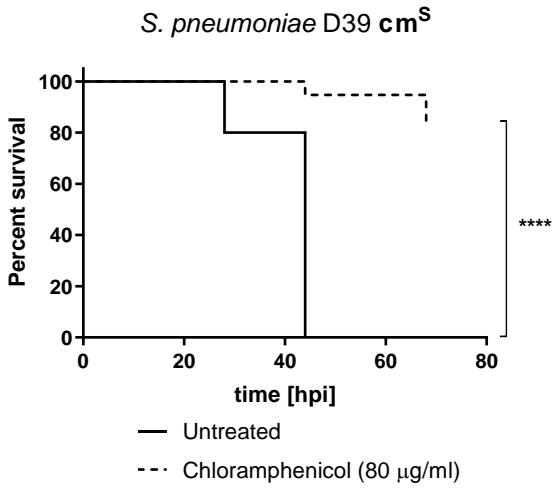

E

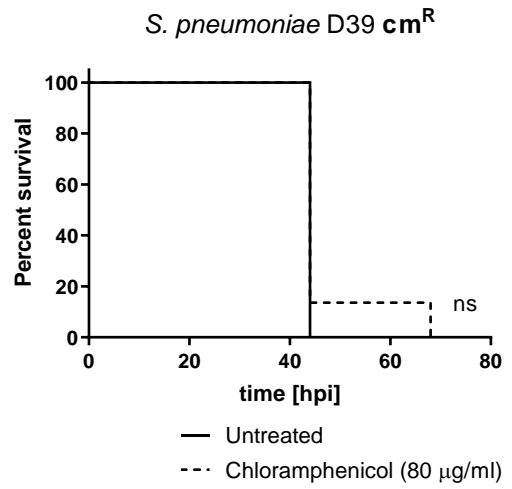

Supplement: f1 [file 9429516.f1.zip › 9429516.f1/Figure S1.pdf]
